# Supplementary material
Source: publisher figshare collection journal article supplement (https://acs.figshare.com/ndownloader/files/24778141)
Supplement: Supplementary file 1 [file 24778141]

# Supporting Information: FeCo Nanowire-Strontium Ferrite Powder Composites For Permanent Magnets with High Energy Products

J.C. Guzmán-Mínguez<sup>1</sup>, S. Ruiz-Gómez<sup>2+</sup>, L.M. Vicente-Arche<sup>1,3</sup>, C. Granados-Miralles<sup>1</sup>, C. Fernández-González<sup>3,4</sup>, F. Mompeán<sup>5</sup>, M. García-Hernández<sup>5</sup>, S. Erohkin<sup>6</sup>, D. Berkov<sup>6</sup>, D. Mishra<sup>7,8</sup>, C. de Julián Fernández<sup>7</sup>, J.F. Fernández<sup>1</sup>, L. Pérez<sup>3,4</sup>, A. Quesada<sup>1\*</sup>

<sup>1</sup>*Instituto de Cerámica y Vidrio (CSIC), Madrid 28049, Spain*

<sup>2</sup>*Departamento de Física de Materiales, Universidad Complutense de Madrid, Madrid 28040, Spain*

<sup>3</sup>*Unité Mixte de Physique, CNRS, Thales, Université Paris-Saclay, (Avenue Augustin Fresnel 1, 91767), Palaiseau, France*

<sup>4</sup>*IMDEA Nanociencia, Calle Faraday 9, 28049 Madrid, Spain*

<sup>5</sup>*Instituto de Ciencia de Materiales de Madrid (CSIC), Madrid 28049, Spain*

<sup>6</sup>*General Numerics Research Lab, Jena, Germany*

<sup>7</sup>*Institute of Materials for Electronics and Magnetism-CNR, Parma, Italy*

<sup>8</sup>*Department of Physics, Indian Institute of Technology Jodhpur, Karwad, Jodhpur 342037, Rajasthan, India*

<sup>+</sup>Current address: ALBA Synchrotron Light Facility, Cerdanyola del Vallès, Barcelona 08290, Spain

<sup>\*</sup>Email address: a.quesada@icv.csic.es

Figure S1 shows SEM images of the dry powders corresponding to 30 and 100 nm diameters. In them, a narrow dispersion of diameters is observed for both diameters. The 100 nm diameter nanowires (NWs) have average length of approximately 2  $\mu\text{m}$ .

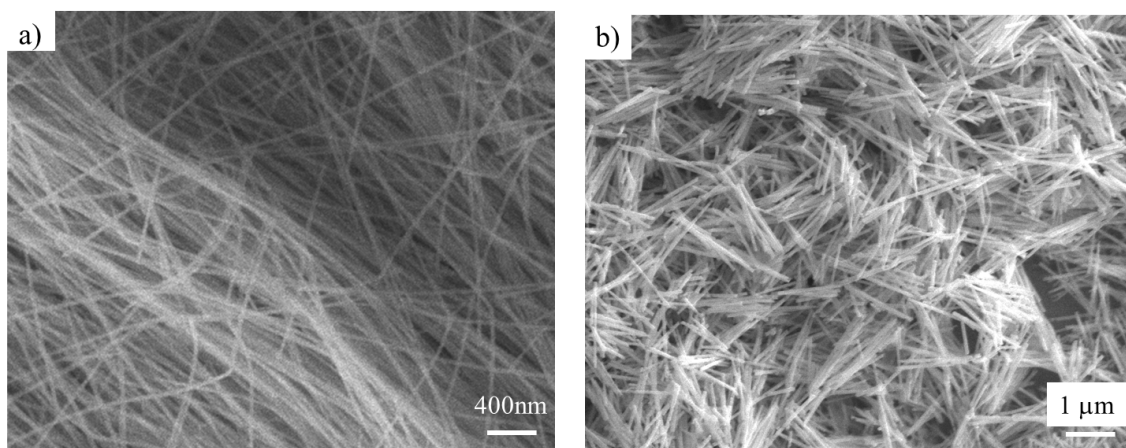

**Figure S1.** SEM images of (a) NW (30 nm) powders, (b) NW (100 nm) powders.

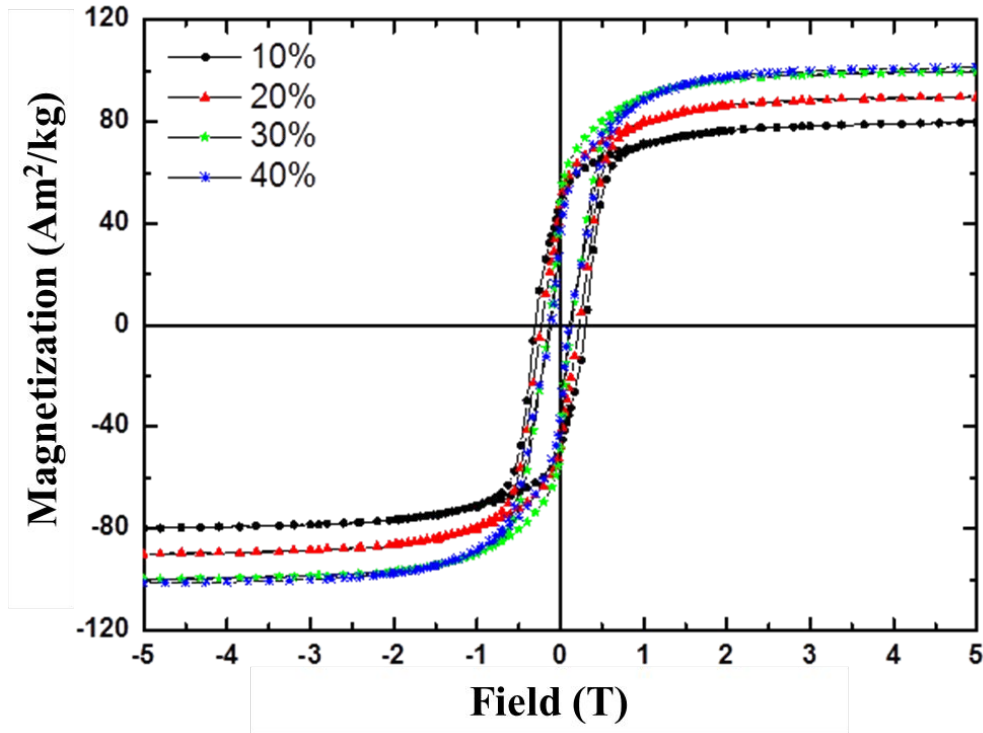

**Figure S2.** Magnetization curves of NW (100 nm)-ferrite composite powders.

Figure S2a shows the magnetization curves of  $\text{SrFe}_{12}\text{O}_{19}$  (strontium ferrite)-NW (100 nm) composites with different NW concentrations between 10-40 wt%. Figure S2b presents the values of  $H_c$ ,  $M_s$  and  $M_r$  as a function of the NW content. The  $M_s$  of the composites increases linearly with the NW content, as expected, reaching  $M_s = 100 \text{ Am}^2/\text{kg}$  for 30 wt%. Unsurprisingly as well,  $H_c$  decreases with NW content, with  $H_c = 98 \text{ kA/m}$  for 30 wt%, a considerably lower value than that of the 30 wt% NW composite made with 50 nm NWs described in the article (130 kA/m).

In order to study the long time stability of the metallic NWs, Figure S3 shows the magnetization curves of the non-oriented 50 nm NWs powder several days after drying the powder (called as-synthesized), and 1 year after drying the powder (called 1 year after). We observe the same magnetization value for both samples  $M_s = 150 \text{ Am}^2/\text{kg}$ . The shape of the curve and the coercivity are very similar too. This indicates that the NWs have not further oxidized after 1 year. It is worth noting that they were simply stored inside a sample tube and no dessicator was used. As suggested by the TGA in Figure 2d of the main text, the passivating layer seems to robustly protect the NWs from oxidation.

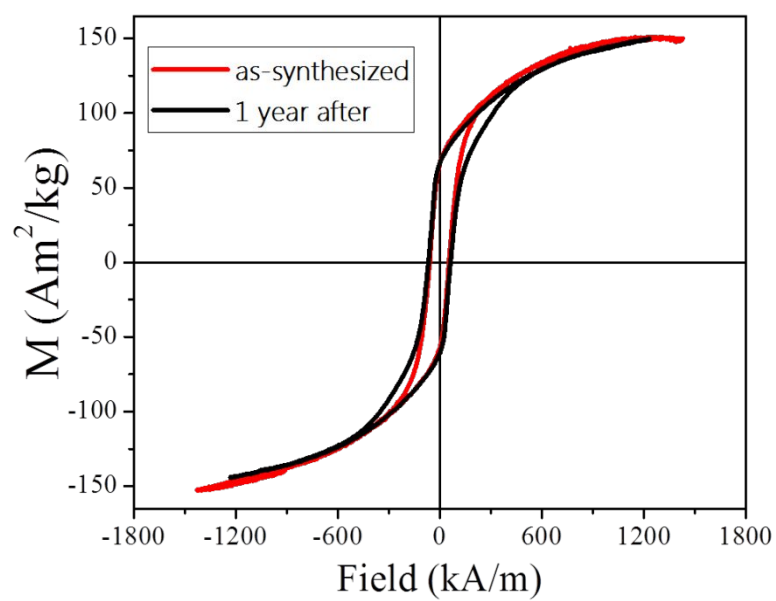

**Figure S3.** Magnetization curves at room-temperature of non-oriented 50 nm NWs powders measured several days after exposing the dry powder to air (as-synthesized), and 1 year after.
